# Supplementary material
Source: publisher figshare collection journal article supplement (https://asha.figshare.com/articles/dataset/_/25595712)
Supplement: Supplementary file 1 [file 1]

**Supplemental Material S6.** The number of effect sizes, participants, and studies and quality ratings of studies contributing to six treatment outcome measures.

| Variable          | Trained language |                  |                  |        | Untrained language |                  |                  |        |
|-------------------|------------------|------------------|------------------|--------|--------------------|------------------|------------------|--------|
|                   | TE               | WLG-Related      | WLG-Unrelated    |        | CLG-Tx             | CLG-Related      | CLG-Unrelated    |        |
|                   | Cohen's <i>d</i> | Cohen's <i>d</i> | Cohen's <i>d</i> | %MPC   | Cohen's <i>d</i>   | Cohen's <i>d</i> | Cohen's <i>d</i> | %MPC   |
| N of Effect Sizes | 43               | 23               | 47               | 32     | 39                 | 23               | 41               | 30     |
| N of Participants | 25               | 17               | 27               | 17     | 21                 | 17               | 22               | 10     |
| N of Studies      | 7                | 5                | 10               | 10     | 6                  | 5                | 8                | 7      |
| Study Quality     | 5 Good           | 3 Good           | 7 Good           | 8 Good | 4 Good             | 3 Good           | 6 Good           | 6 Good |
| Ratings           | 2 Fair           | 2 Fair           | 3 Fair           | 2 Fair | 2 Fair             | 2 Fair           | 2 Fair           | 1 Fair |

*Note.* CLG-Tx = Cross-language generalization of trained words. CLG-Related = Cross-language generalization of untrained related words. CLG-Unrelated = Cross-language generalization of untrained unrelated words. N = Number. TE = Treatment effect. WLG-Related = Within-language generalization of untrained related words. WLG-Unrelated = Within-language generalization of untrained unrelated words. %MPC = Percent of maximum possible change.
