# Supplementary material
Source: publisher figshare collection journal article supplement (https://asha.figshare.com/articles/dataset/_/25595712)
Supplement: Supplementary file 3 [file 1]

## Supplemental Material S7. ROBIS risk of bias ratings of the meta-analysis.

| <b>Phase 2: Identifying concerns with the review process</b>                                                                                                       |               |
|--------------------------------------------------------------------------------------------------------------------------------------------------------------------|---------------|
| <b>Domain 1: Study eligibility criteria</b>                                                                                                                        | <b>Rating</b> |
| 1.1 Did the review adhere to pre-defined objectives and eligibility criteria?                                                                                      | Yes           |
| 1.2 Were the eligibility criteria appropriate for the review question?                                                                                             | Yes           |
| 1.3 Were eligibility criteria unambiguous?                                                                                                                         | Yes           |
| 1.4 Were any restrictions in eligibility criteria based on study characteristics appropriate (e.g. date, sample size, study quality, outcomes measured)?           | Yes           |
| 1.5 Were any restrictions in eligibility criteria based on sources of information appropriate (e.g. publication status or format, language, availability of data)? | Yes           |
| Risk of bias present in Domain 1                                                                                                                                   | Low           |
| <b>Domain 2: Identification and selection of studies</b>                                                                                                           |               |
| 2.1 Did the search include an appropriate range of databases/electronic sources for published and unpublished reports?                                             | Yes           |
| 2.2 Were methods additional to database searching used to identify relevant reports?                                                                               | No            |
| 2.3 Were the terms and structure of the search strategy likely to retrieve as many eligible studies as possible?                                                   | Yes           |
| 2.4 Were restrictions based on date, publication format, or language appropriate?                                                                                  | Yes           |
| 2.5 Were efforts made to minimize error in selection of studies?                                                                                                   | Yes           |
| Risk of bias present in Domain 2                                                                                                                                   | Low           |
| <b>Domain 3: Data collection and study appraisal</b>                                                                                                               |               |
| 3.1 Were efforts made to minimize error in data collection?                                                                                                        | Yes           |
| 3.2 Were sufficient study characteristics available for both review authors and readers to be able to interpret the results?                                       | Yes           |
| 3.3 Were all relevant study results collected for use in the synthesis?                                                                                            | Yes           |
| 3.4 Was risk of bias (or methodological quality) formally assessed using appropriate criteria?                                                                     | Yes           |
| 3.5 Were efforts made to minimize error in risk of bias assessment?                                                                                                | Yes           |
| Risk of bias present in Domain 3                                                                                                                                   | Low           |
| <b>Domain 4: Synthesis and findings</b>                                                                                                                            |               |
| 4.1 Did the synthesis include all studies that it should?                                                                                                          | Yes           |
| 4.2 Were all pre-defined analyses reported or departures explained?                                                                                                | Yes           |

|                                                                                                                                                  |              |
|--------------------------------------------------------------------------------------------------------------------------------------------------|--------------|
| 4.3 Was the synthesis appropriate given the nature and similarity in the research questions, study designs and outcomes across included studies? | Yes          |
| 4.4 Was between-study variation (heterogeneity) minimal or addressed in the synthesis?                                                           | Yes          |
| 4.5 Were the findings robust, e.g. as demonstrated through funnel plot or sensitivity analyses?                                                  | Probably yes |
| 4.6 Were biases in primary studies minimal or addressed in the synthesis?                                                                        | Yes          |
| Risk of bias present in Domain 4                                                                                                                 | Low          |
| <b>Phase 3: Risk of bias in the review</b>                                                                                                       |              |
| A. Did the interpretation of findings address all of the concerns identified in Domains 1 to 4?                                                  | Yes          |
| B. Was the relevance of identified studies to the review's research question appropriately considered?                                           | Yes          |
| C. Did the reviewers avoid emphasizing results on the basis of their statistical significance?                                                   | Yes          |
| <b>Risk of bias in the review</b>                                                                                                                | <b>Low</b>   |
