# Supplementary material
Source: publisher figshare collection journal article supplement (https://asha.figshare.com/articles/dataset/_/25595712)
Supplement: Supplementary file 4 [file 1]

### Supplemental Material S3. Methodological quality ratings of studies included in the meta-analysis.

#### S3.1 Quality ratings of studies with single-case experimental design

| Study                         | 1.Clinical history <sup>a</sup> | 2.Target behaviors | 3.Study design | 4.Baseline | 5.Sampling behaviors during treatment | 6.Raw data record | 7.Inter-rater reliability | 8.Independence of assessors | 9.Statistical analysis | 10.Replication | 11.Generalization | Total score (quality rating) |
|-------------------------------|---------------------------------|--------------------|----------------|------------|---------------------------------------|-------------------|---------------------------|-----------------------------|------------------------|----------------|-------------------|------------------------------|
| Edmonds and Kiran (2006)      | 1                               | 1                  | 1              | 1          | 1                                     | 1                 | 1                         | 0                           | 1                      | 1              | 1                 | 9/10 (good)                  |
| Kiran and Roberts (2010)      | 1                               | 1                  | 1              | 1          | 1                                     | 1                 | 1                         | 0                           | 1                      | 1              | 1                 | 9/10 (good)                  |
| Kiran and Iakupova (2011)     | 1                               | 1                  | 1              | 1          | 1                                     | 1                 | 0                         | 0                           | 1                      | 0              | 1                 | 7/10 (fair)                  |
| Kiran et al. (2013)           | 1                               | 1                  | 1              | 1          | 1                                     | 0                 | 0                         | 0                           | 1                      | 1              | 1                 | 7/10 (fair)                  |
| Li et al. (2020)              | 1                               | 1                  | 1              | 1          | 1                                     | 1                 | 1                         | 0                           | 1                      | 1              | 1                 | 9/10 (good)                  |
| Lerman (2022)                 | 1                               | 1                  | 1              | 1          | 0                                     | 0                 | 0                         | 0                           | 1                      | 1              | 1                 | 6/10 (fair)                  |
| Lerman et al. (2022)          | 1                               | 1                  | 1              | 1          | 1                                     | 1                 | 1                         | 0                           | 1                      | 1              | 1                 | 9/10 (good)                  |
| Lopez et al. (2022)           | 1                               | 1                  | 1              | 1          | 1                                     | 1                 | 0                         | 0                           | 1                      | 1              | 1                 | 8/10 (good)                  |
| Masson-Trottier et al. (2022) | 1                               | 1                  | 1              | 1          | 1                                     | 1                 | 0                         | 0                           | 1                      | 1              | 1                 | 8/10 (good)                  |
| Lerman et al. (2023)          | 1                               | 1                  | 1              | 1          | 1                                     | 1                 | 1                         | 0                           | 1                      | 0              | 1                 | 8/10 (good)                  |

Note: <sup>a</sup> First item assessing clinical history of participants does not contribute to the total score.

### S3.2 Quality ratings of studies with pre-post case-study design

| Study                  | 1. Was the study question or objective clearly stated? | 2. Was the study population clearly and fully described, including a case definition? | 5. Was the intervention clearly described? | 6. Were the outcome measures clearly defined, valid, reliable, and implemented consistently across all study participants? | 8. Were the statistical methods well-described? | 9. Were the results well-described? | Total score (quality rating) |
|------------------------|--------------------------------------------------------|---------------------------------------------------------------------------------------|--------------------------------------------|----------------------------------------------------------------------------------------------------------------------------|-------------------------------------------------|-------------------------------------|------------------------------|
| Kohnert (2004)         | 1                                                      | 1                                                                                     | 0                                          | 1                                                                                                                          | 0                                               | 1                                   | 4/6 (fair)                   |
| Ansaldi et al. (2010)  | 1                                                      | 1                                                                                     | 1                                          | 1                                                                                                                          | 1                                               | 1                                   | 6/6 (good)                   |
| Croft et al. (2011)    | 1                                                      | 1                                                                                     | 1                                          | 1                                                                                                                          | 1                                               | 1                                   | 6/6 (good)                   |
| Goral et al. (2012)    | 1                                                      | 1                                                                                     | 1                                          | 0                                                                                                                          | 1                                               | 1                                   | 5/6 (good)                   |
| Miller Amberber (2012) | 1                                                      | 1                                                                                     | 1                                          | 1                                                                                                                          | 1                                               | 1                                   | 6/6 (good)                   |
| Knoph et al. (2017)    | 1                                                      | 1                                                                                     | 1                                          | 1                                                                                                                          | 1                                               | 0                                   | 5/6 (good)                   |
| Lerman et al. (2019)   | 1                                                      | 1                                                                                     | 1                                          | 1                                                                                                                          | 1                                               | 1                                   | 6/6 (good)                   |
