# Supplementary material
Source: publisher figshare collection journal article supplement (https://asha.figshare.com/articles/dataset/_/25595712)
Supplement: Supplementary file 5 [file 1]

## **Supplemental Material S1.** Extended search strategies for individual databases.

### *SI.1 CINAHL (searched through EBSCO):*

TI ( ((aphasi\* OR anomi\* OR dysphasi\*) AND (therap\* OR treat\* OR rehab\* OR interven\* OR train\* OR recover\* OR generali\*)) AND (biling\* OR multiling\* OR polyglot\* OR triling\* OR quadriling\* OR emigrant\* OR immigrant\* OR "English language learn\*" OR "second language learn\*" ) ) OR AB ( ((aphasi\* OR anomi\* OR dysphasi\*) AND (therap\* OR treat\* OR rehab\* OR interven\* OR train\* OR recover\* OR generali\*)) AND (biling\* OR multiling\* OR polyglot\* OR triling\* OR quadriling\* OR emigrant\* OR immigrant\* OR "English language learn\*" OR "second language learn\*" ) )

Limiters - Published Date: 20000101-

Search modes - Boolean/Phrase

### *SI.2 ERIC (searched through EBSCO):*

TI ( ((aphasi\* OR anomi\* OR dysphasi\*) AND (therap\* OR treat\* OR rehab\* OR interven\* OR train\* OR recover\* OR generali\*)) AND (biling\* OR multiling\* OR polyglot\* OR triling\* OR quadriling\* OR emigrant\* OR immigrant\* OR "English language learn\*" OR "second language learn\*" ) ) OR AB ( ((aphasi\* OR anomi\* OR dysphasi\*) AND (therap\* OR treat\* OR rehab\* OR interven\* OR train\* OR recover\* OR generali\*)) AND (biling\* OR multiling\* OR polyglot\* OR triling\* OR quadriling\* OR emigrant\* OR immigrant\* OR "English language learn\*" OR "second language learn\*" ) ) OR KW ( ((aphasi\* OR anomi\* OR dysphasi\*) AND (therap\* OR treat\* OR rehab\* OR interven\* OR train\* OR recover\* OR generali\*)) AND (biling\* OR multiling\* OR polyglot\* OR triling\* OR quadriling\* OR emigrant\* OR immigrant\* OR "English language learn\*" OR "second language learn\*" ) )

Limiters - Date Published: 20000101-

Search modes - Boolean/Phrase

### *SI.3 Google Scholar:*

- allintitle:(aphasia OR aphasic OR anomia OR anomic OR dysphasia OR dysphasic) AND (therapy OR therapeutic OR treat OR treating OR treatment OR train OR training) AND (bilingual OR bilingualism OR multilingual OR multilingualism OR polyglot OR trilingual)
- allintitle:(aphasia OR aphasic OR anomia OR anomic OR dysphasia OR dysphasic) AND (therapy OR therapeutic OR treat OR treating OR treatment OR train OR training) AND (quadrilingual OR emigrant OR immigrant OR "english language learner")
- allintitle:(aphasia OR aphasic OR anomia OR anomic OR dysphasia OR dysphasic) AND (therapy OR therapeutic OR treat OR treating OR treatment OR train OR training) AND ("english language learning" OR "second language learner" OR "second language learning")
- allintitle:(aphasia OR aphasic OR anomia OR anomic OR dysphasia OR dysphasic) AND (recover OR recovering OR recovery) AND (bilingual OR bilingualism OR multilingual OR multilingualism OR polyglot OR trilingual)
- allintitle:(aphasia OR aphasic OR anomia OR anomic OR dysphasia OR dysphasic) AND (recover OR recovering OR recovery) AND (quadrilingual OR emigrant OR immigrant OR "english language learner")

- allintitle:(aphasia OR aphasic OR anomia OR anomic OR dysphasia OR dysphasic) AND (recover OR recovering OR recovery) AND ("english language learning" OR "second language learner" OR "second language learning")
- allintitle:(aphasia OR aphasic OR anomia OR anomic OR dysphasia OR dysphasic) AND (rehabilitate OR rehabilitating OR rehabilitation OR rehabilitative) AND (bilingual OR bilingualism OR multilingual OR multilingualism OR polyglot OR trilingual)
- allintitle:(aphasia OR aphasic OR anomia OR anomic OR dysphasia OR dysphasic) AND (rehabilitate OR rehabilitating OR rehabilitation OR rehabilitative) AND (quadrilingual OR emigrant OR immigrant OR "english language learner")
- allintitle:(aphasia OR aphasic OR anomia OR anomic OR dysphasia OR dysphasic) AND (rehabilitate OR rehabilitating OR rehabilitation OR rehabilitative) AND ("english language learning" OR "second language learner" OR "second language learning")
- allintitle:(aphasia OR aphasic OR anomia OR anomic OR dysphasia OR dysphasic) AND (intervene OR intervening OR intervention OR interventive OR interventional) AND (bilingual OR bilingualism OR multilingual OR multilingualism OR polyglot OR trilingual)
- allintitle:(aphasia OR aphasic OR anomia OR anomic OR dysphasia OR dysphasic) AND (intervene OR intervening OR intervention OR interventive OR interventional) AND (quadrilingual OR emigrant OR immigrant OR "english language learner")
- allintitle:(aphasia OR aphasic OR anomia OR anomic OR dysphasia OR dysphasic) AND (intervene OR intervening OR intervention OR interventive OR interventional) AND ("english language learning" OR "second language learner" OR "second language learning")
- allintitle:(aphasia OR aphasic OR anomia OR anomic OR dysphasia OR dysphasic) AND (generalize OR generalizing OR generalization OR generalizable OR generalizability) AND (bilingual OR bilingualism OR multilingual OR multilingualism OR polyglot OR trilingual)
- allintitle:(aphasia OR aphasic OR anomia OR anomic OR dysphasia OR dysphasic) AND (generalize OR generalizing OR generalization OR generalizable OR generalizability) AND (quadrilingual OR emigrant OR immigrant OR "english language learner")
- allintitle:(aphasia OR aphasic OR anomia OR anomic OR dysphasia OR dysphasic) AND (generalize OR generalizing OR generalization OR generalizable OR generalizability) AND ("english language learning" OR "second language learner" OR "second language learning")

#### *SI.4 LLBA:*

ti(((aphasi\* OR anomi\* OR dysphasi\*) AND (therap\* OR treat\* OR rehab\* OR interven\* OR train\* OR recover\* OR generali\*)) AND (biling\* OR multiling\* OR polyglot\* OR triling\* OR quadriling\* OR emigrant\* OR immigrant\* OR "English language learn\*" OR "second language learn\*")) OR ab(((aphasi\* OR anomi\* OR dysphasi\*) AND (therap\* OR treat\* OR rehab\* OR interven\* OR train\* OR recover\* OR generali\*)) AND (biling\* OR multiling\* OR polyglot\* OR triling\* OR quadriling\* OR emigrant\* OR immigrant\* OR "English language learn\*" OR "second language learn\*")) OR if(((aphasi\* OR anomi\* OR dysphasi\*) AND (therap\* OR treat\* OR rehab\* OR interven\* OR train\* OR recover\* OR generali\*)) AND (biling\* OR multiling\* OR polyglot\* OR triling\* OR quadriling\* OR emigrant\* OR immigrant\* OR "English language learn\*" OR "second language learn\*"))

Additional limits - Date: After 2000, Limit to peer-reviewed journals

*SI.5 MEDLINE (searched through PubMed):*

((Aphasi\*[Title/Abstract] OR anomi\*[Title/Abstract] OR dysphasi\*[Title/Abstract]) AND (Therap\*[Title/Abstract] OR treat\*[Title/Abstract] OR rehab\*[Title/Abstract] OR interven\*[Title/Abstract] OR train\*[Title/Abstract] OR recover\*[Title/Abstract] OR general\*[Title/Abstract])) AND (Biling\*[Title/Abstract] OR multiling\*[Title/Abstract] OR polyglot\*[Title/Abstract] OR triling\*[Title/Abstract] OR quadriling\*[Title/Abstract] OR emigrant\*[Title/Abstract] OR immigrant\*[Title/Abstract] OR "English language learn\*[Title/Abstract] OR "second language learn\*[Title/Abstract]) AND (2000:3000/12/12[pdat]) Filters: MEDLINE, from 2000 - 3000/12/12  
 (("aphasi\*[Title/Abstract] OR "anomi\*[Title/Abstract] OR "dysphasi\*[Title/Abstract]) AND ("therap\*[Title/Abstract] OR "treat\*[Title/Abstract] OR "rehab\*[Title/Abstract] OR "interven\*[Title/Abstract] OR "train\*[Title/Abstract] OR "recover\*[Title/Abstract] OR "general\*[Title/Abstract]) AND ("biling\*[Title/Abstract] OR "multiling\*[Title/Abstract] OR "polyglot\*[Title/Abstract] OR "triling\*[Title/Abstract] OR "quadriling\*[Title/Abstract] OR "emigrant\*[Title/Abstract] OR "immigrant\*[Title/Abstract] OR "english language learn\*[Title/Abstract] OR "second language learn\*[Title/Abstract]) AND 2000/01/01:3000/12/12[Date - Publication]) AND ((medline[Filter]) AND (2000:3000/12/12[pdat]))

*SI.6 MLA International Bibliography (searched through EBSCO):*

TI ( ((aphasi\* OR anomi\* OR dysphasi\*) AND (therap\* OR treat\* OR rehab\* OR interven\* OR train\* OR recover\* OR general\*)) AND (biling\* OR multiling\* OR polyglot\* OR triling\* OR quadriling\* OR emigrant\* OR immigrant\* OR "English language learn\*" OR "second language learn\*" ) OR AB ( ((aphasi\* OR anomi\* OR dysphasi\*) AND (therap\* OR treat\* OR rehab\* OR interven\* OR train\* OR recover\* OR general\*)) AND (biling\* OR multiling\* OR polyglot\* OR triling\* OR quadriling\* OR emigrant\* OR immigrant\* OR "English language learn\*" OR "second language learn\*" ) )

Limiters - Publication Date: 20000101-

Search modes - Boolean/Phrase

*SI.7 PsycINFO (searched through EBSCO):*

TI ( ((aphasi\* OR anomi\* OR dysphasi\*) AND (therap\* OR treat\* OR rehab\* OR interven\* OR train\* OR recover\* OR general\*)) AND (biling\* OR multiling\* OR polyglot\* OR triling\* OR quadriling\* OR emigrant\* OR immigrant\* OR "English language learn\*" OR "second language learn\*" ) OR AB ( ((aphasi\* OR anomi\* OR dysphasi\*) AND (therap\* OR treat\* OR rehab\* OR interven\* OR train\* OR recover\* OR general\*)) AND (biling\* OR multiling\* OR polyglot\* OR triling\* OR quadriling\* OR emigrant\* OR immigrant\* OR "English language learn\*" OR "second language learn\*" ) OR KW ( ((aphasi\* OR anomi\* OR dysphasi\*) AND (therap\* OR treat\* OR rehab\* OR interven\* OR train\* OR recover\* OR general\*)) AND (biling\* OR multiling\* OR polyglot\* OR triling\* OR quadriling\* OR emigrant\* OR immigrant\* OR "English language learn\*" OR "second language learn\*" ) )

Limiters - Publication Year: 2000-

Search modes - Boolean/Phrase

### *SI.8 PubMed:*

((Aphasi\*[Title/Abstract] OR anomi\*[Title/Abstract] OR dysphasi\*[Title/Abstract]) AND (Therap\*[Title/Abstract] OR treat\*[Title/Abstract] OR rehab\*[Title/Abstract] OR interven\*[Title/Abstract] OR train\*[Title/Abstract] OR recover\*[Title/Abstract] OR general\*[Title/Abstract])) AND (Biling\*[Title/Abstract] OR multiling\*[Title/Abstract] OR polyglot\*[Title/Abstract] OR triling\*[Title/Abstract] OR quadriling\*[Title/Abstract] OR emigrant\*[Title/Abstract] OR immigrant\*[Title/Abstract] OR "English language learn\*[Title/Abstract] OR "second language learn\*[Title/Abstract]) Filters: from 2000 - 3000/12/12

(("aphasi\*[Title/Abstract] OR "anomi\*[Title/Abstract] OR "dysphasi\*[Title/Abstract]) AND ("therap\*[Title/Abstract] OR "treat\*[Title/Abstract] OR "rehab\*[Title/Abstract] OR "interven\*[Title/Abstract] OR "train\*[Title/Abstract] OR "recover\*[Title/Abstract] OR "general\*[Title/Abstract]) AND ("biling\*[Title/Abstract] OR "multiling\*[Title/Abstract] OR "polyglot\*[Title/Abstract] OR "triling\*[Title/Abstract] OR "quadriling\*[Title/Abstract] OR "emigrant\*[Title/Abstract] OR "immigrant\*[Title/Abstract] OR "english language learn\*[Title/Abstract] OR "second language learn\*[Title/Abstract])) AND (2000:3000/12/12[pdat])

### *SI.9 Web of Science:*

(TS=(((aphasi\* OR anomi\* OR dysphasi\*) AND (therap\* OR treat\* OR rehab\* OR interven\* OR train\* OR recover\* OR general\*)) AND (biling\* OR multiling\* OR polyglot\* OR triling\* OR quadriling\* OR emigrant\* OR immigrant\* OR "English language learn\*" OR "second language learn\*"))) AND (PY==("2022" OR "2021" OR "2020" OR "2019" OR "2018" OR "2017" OR "2016" OR "2015" OR "2014" OR "2013" OR "2012" OR "2011" OR "2010" OR "2009" OR "2008" OR "2007" OR "2006" OR "2005" OR "2004" OR "2003" OR "2002" OR "2001" OR "2000"))
